# Supplementary material for: A new 3D full-Stokes calving algorithm within Elmer/Ice (v9.0)
Source: Copernicus journal article supplement (doi:10.5194/gmd-17-5759-2024), 2024-07-31
Supplement: Supplementary file 2 [file gmd-17-5759-2024-supplement.zip]

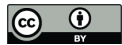

## *Supplement of*

# **A new 3D full-Stokes calving algorithm within Elmer/Ice (v9.0)**

**Iain Wheel et al.**

*Correspondence to:* Iain Wheel (iw43@st-andrews.ac.uk)

- [gmd-17-5759-2024-supplement-title-page.pdf](#)
- [AlgorithmOutline.pdf](#)
- [Appendix](#)
  - [NoPinningPoints](#)
    - \* [CalvingMMGtest\\_ratelaw1500\\_025day\\_calvingstats.txt](#)
    - \* [CalvingMMGtest\\_ratelaw1500\\_025day\\_terminusposition.txt](#)
    - \* [CalvingMMGtest\\_ratelaw1500\\_033day\\_calvingstats.txt](#)
    - \* [CalvingMMGtest\\_ratelaw1500\\_033day\\_terminusposition.txt](#)
    - \* [CalvingMMGtest\\_ratelaw1500\\_05day\\_calvingstats.txt](#)
    - \* [CalvingMMGtest\\_ratelaw1500\\_05day\\_restart\\_calvingstats.txt](#)
    - \* [CalvingMMGtest\\_ratelaw1500\\_05day\\_restart\\_terminusposition.txt](#)
    - \* [CalvingMMGtest\\_ratelaw1500\\_05day\\_terminusposition.txt](#)
    - \* [CalvingMMGtest\\_ratelaw1500\\_2day\\_calvingstats.txt](#)
    - \* [CalvingMMGtest\\_ratelaw1500\\_2day\\_terminusposition.txt](#)
    - \* [CalvingMMGtest\\_ratelaw1500\\_atime0\\_calvingstats.txt](#)
    - \* [CalvingMMGtest\\_ratelaw1500\\_atime0\\_terminusposition.txt](#)
    - \* [CalvingMMGtest\\_ratelaw1500\\_atime10\\_calvingstats.txt](#)
    - \* [CalvingMMGtest\\_ratelaw1500\\_atime10\\_terminusposition.txt](#)
    - \* [CalvingMMGtest\\_ratelaw1500\\_atime1\\_calvingstats.txt](#)
    - \* [CalvingMMGtest\\_ratelaw1500\\_atime1\\_terminusposition.txt](#)
    - \* [CalvingMMGtest\\_ratelaw1500\\_atime5\\_calvingstats.txt](#)
    - \* [CalvingMMGtest\\_ratelaw1500\\_atime5\\_terminusposition.txt](#)
    - \* [CalvingMMGtest\\_ratelaw1500\\_control\\_calvingstats.txt](#)
    - \* [CalvingMMGtest\\_ratelaw1500\\_control\\_terminusposition.txt](#)
    - \* [CalvingMMGtest\\_ratelaw1500\\_h100\\_v100\\_calvingstats.txt](#)
    - \* [CalvingMMGtest\\_ratelaw1500\\_h100\\_v100\\_terminusposition.txt](#)
    - \* [CalvingMMGtest\\_ratelaw1500\\_h100\\_v50\\_calvingstats.txt](#)
    - \* [CalvingMMGtest\\_ratelaw1500\\_h100\\_v50\\_terminusposition.txt](#)

- \* CalvingMMGtest\_ratelaw1500\_h25\_v25\_calvingstats.txt
- \* CalvingMMGtest\_ratelaw1500\_h25\_v25\_terminusposition.txt
- \* CalvingMMGtest\_ratelaw1500\_h25\_v50\_calvingstats.txt
- \* CalvingMMGtest\_ratelaw1500\_h25\_v50\_terminusposition.txt
- \* CalvingMMGtest\_ratelaw1500\_h30\_v30\_calvingstats.txt
- \* CalvingMMGtest\_ratelaw1500\_h30\_v30\_terminusposition.txt
- \* CalvingMMGtest\_ratelaw1500\_h30\_v50\_calvingstats.txt
- \* CalvingMMGtest\_ratelaw1500\_h30\_v50\_terminusposition.txt
- \* CalvingMMGtest\_ratelaw1500\_h50\_v100\_calvingstats.txt
- \* CalvingMMGtest\_ratelaw1500\_h50\_v100\_terminusposition.txt
- \* CalvingMMGtest\_ratelaw1500\_h50\_v25\_calvingstats.txt
- \* CalvingMMGtest\_ratelaw1500\_h50\_v25\_terminusposition.txt
- \* CalvingMMGtest\_ratelaw1500\_h50\_v30\_calvingstats.txt
- \* CalvingMMGtest\_ratelaw1500\_h50\_v30\_terminusposition.txt
- \* CalvingMMGtest\_ratelaw1500\_h50\_v70\_calvingstats.txt
- \* CalvingMMGtest\_ratelaw1500\_h50\_v70\_terminusposition.txt
- \* CalvingMMGtest\_ratelaw1500\_h70\_v50\_calvingstats.txt
- \* CalvingMMGtest\_ratelaw1500\_h70\_v50\_terminusposition.txt
- \* CalvingMMGtest\_ratelaw1500\_h70\_v70\_calvingstats.txt
- \* CalvingMMGtest\_ratelaw1500\_h70\_v70\_terminusposition.txt

– PinningPoints

- \* CalvingMMGtest\_ratelaw1500\_025day\_calvingstats.txt
- \* CalvingMMGtest\_ratelaw1500\_025day\_terminusposition.txt
- \* CalvingMMGtest\_ratelaw1500\_033day\_calvingstats.txt
- \* CalvingMMGtest\_ratelaw1500\_033day\_terminusposition.txt
- \* CalvingMMGtest\_ratelaw1500\_05day\_calvingstats.txt
- \* CalvingMMGtest\_ratelaw1500\_05day\_terminusposition.txt
- \* CalvingMMGtest\_ratelaw1500\_2day\_calvingstats.txt
- \* CalvingMMGtest\_ratelaw1500\_2day\_terminusposition.txt
- \* CalvingMMGtest\_ratelaw1500\_atime0\_calvingstats.txt
- \* CalvingMMGtest\_ratelaw1500\_atime0\_terminusposition.txt
- \* CalvingMMGtest\_ratelaw1500\_atime10\_calvingstats.txt
- \* CalvingMMGtest\_ratelaw1500\_atime10\_terminusposition.txt
- \* CalvingMMGtest\_ratelaw1500\_atime1\_calvingstats.txt
- \* CalvingMMGtest\_ratelaw1500\_atime1\_terminusposition.txt
- \* CalvingMMGtest\_ratelaw1500\_atime5\_calvingstats.txt
- \* CalvingMMGtest\_ratelaw1500\_atime5\_terminusposition.txt
- \* CalvingMMGtest\_ratelaw1500\_control\_calvingstats.txt
- \* CalvingMMGtest\_ratelaw1500\_control\_terminusposition.txt
- \* CalvingMMGtest\_ratelaw1500\_h100\_v100\_calvingstats.txt
- \* CalvingMMGtest\_ratelaw1500\_h100\_v100\_terminusposition.txt
- \* CalvingMMGtest\_ratelaw1500\_h100\_v50\_calvingstats.txt
- \* CalvingMMGtest\_ratelaw1500\_h100\_v50\_terminusposition.txt
- \* CalvingMMGtest\_ratelaw1500\_h25\_v25\_calvingstats.txt
- \* CalvingMMGtest\_ratelaw1500\_h25\_v25\_terminusposition.txt
- \* CalvingMMGtest\_ratelaw1500\_h25\_v50\_calvingstats.txt
- \* CalvingMMGtest\_ratelaw1500\_h25\_v50\_terminusposition.txt

- \* CalvingMMGtest\_ratelaw1500\_h30\_v30\_calvingstats.txt
- \* CalvingMMGtest\_ratelaw1500\_h30\_v30\_terminusposition.txt
- \* CalvingMMGtest\_ratelaw1500\_h30\_v50\_calvingstats.txt
- \* CalvingMMGtest\_ratelaw1500\_h30\_v50\_terminusposition.txt
- \* CalvingMMGtest\_ratelaw1500\_h50\_v100\_calvingstats.txt
- \* CalvingMMGtest\_ratelaw1500\_h50\_v100\_terminusposition.txt
- \* CalvingMMGtest\_ratelaw1500\_h50\_v25\_calvingstats.txt
- \* CalvingMMGtest\_ratelaw1500\_h50\_v25\_terminusposition.txt
- \* CalvingMMGtest\_ratelaw1500\_h50\_v30\_calvingstats.txt
- \* CalvingMMGtest\_ratelaw1500\_h50\_v30\_terminusposition.txt
- \* CalvingMMGtest\_ratelaw1500\_h50\_v70\_calvingstats.txt
- \* CalvingMMGtest\_ratelaw1500\_h50\_v70\_terminusposition.txt
- \* CalvingMMGtest\_ratelaw1500\_h70\_v50\_calvingstats.txt
- \* CalvingMMGtest\_ratelaw1500\_h70\_v50\_terminusposition.txt
- \* CalvingMMGtest\_ratelaw1500\_h70\_v70\_calvingstats.txt
- \* CalvingMMGtest\_ratelaw1500\_h70\_v70\_terminusposition.txt

- NoPinningPoints

- CalvingMMGtest\_925\_025day\_calvingstats.txt
- CalvingMMGtest\_925\_025day\_restart\_calvingstats.txt
- CalvingMMGtest\_925\_025day\_restart\_terminusposition.txt
- CalvingMMGtest\_925\_025day\_terminusposition.txt
- CalvingMMGtest\_925\_033day\_calvingstats.txt
- CalvingMMGtest\_925\_033day\_terminusposition.txt
- CalvingMMGtest\_925\_05day\_calvingstats.txt
- CalvingMMGtest\_925\_05day\_terminusposition.txt
- CalvingMMGtest\_925\_2day\_calvingstats.txt
- CalvingMMGtest\_925\_2day\_terminusposition.txt
- CalvingMMGtest\_925\_atime0\_calvingstats.txt
- CalvingMMGtest\_925\_atime0\_terminusposition.txt
- CalvingMMGtest\_925\_atime10\_calvingstats.txt
- CalvingMMGtest\_925\_atime10\_terminusposition.txt
- CalvingMMGtest\_925\_atime1\_calvingstats.txt
- CalvingMMGtest\_925\_atime1\_terminusposition.txt
- CalvingMMGtest\_925\_atime5\_calvingstats.txt
- CalvingMMGtest\_925\_atime5\_terminusposition.txt
- CalvingMMGtest\_925\_control\_calvingstats.txt
- CalvingMMGtest\_925\_control\_terminusposition.txt
- CalvingMMGtest\_925\_h100\_v100\_calvingstats.txt
- CalvingMMGtest\_925\_h100\_v100\_terminusposition.txt
- CalvingMMGtest\_925\_h100\_v50\_calvingstats.txt
- CalvingMMGtest\_925\_h100\_v50\_terminusposition.txt
- CalvingMMGtest\_925\_h25\_v25\_calvingstats.txt
- CalvingMMGtest\_925\_h25\_v25\_restart\_calvingstats.txt

- CalvingMMGtest\_925\_h25\_v25\_restart\_terminusposition.txt
- CalvingMMGtest\_925\_h25\_v25\_terminusposition.txt
- CalvingMMGtest\_925\_h25\_v50\_calvingstats.txt
- CalvingMMGtest\_925\_h25\_v50\_terminusposition.txt
- CalvingMMGtest\_925\_h30\_v30\_calvingstats.txt
- CalvingMMGtest\_925\_h30\_v30\_terminusposition.txt
- CalvingMMGtest\_925\_h30\_v50\_calvingstats.txt
- CalvingMMGtest\_925\_h30\_v50\_terminusposition.txt
- CalvingMMGtest\_925\_h50\_v30\_calvingstats.txt
- CalvingMMGtest\_925\_h50\_v30\_terminusposition.txt
- CalvingMMGtest\_925\_h50\_v70\_calvingstats.txt
- CalvingMMGtest\_925\_h50\_v70\_terminusposition.txt
- CalvingMMGtest\_925\_h70\_v50\_calvingstats.txt
- CalvingMMGtest\_925\_h70\_v50\_terminusposition.txt
- CalvingMMGtest\_925\_h70\_v70\_calvingstats.txt
- CalvingMMGtest\_925\_h70\_v70\_terminusposition.txt
- CalvingMMGtest\_925\_pmesh20\_calvingstats.txt
- CalvingMMGtest\_925\_pmesh20\_terminusposition.txt
- CalvingMMGtest\_925\_pmesh30\_calvingstats.txt
- CalvingMMGtest\_925\_pmesh30\_terminusposition.txt
- CalvingMMGtest\_925\_pmesh60\_calvingstats.txt
- CalvingMMGtest\_925\_pmesh60\_terminusposition.txt
- CalvingMMGtest\_925\_pmesh80\_calvingstats.txt
- CalvingMMGtest\_925\_pmesh80\_terminusposition.txt

- PinningPoints

- CalvingMMGtest\_925\_025day\_calvingstats.txt
- CalvingMMGtest\_925\_025day\_terminusposition.txt
- CalvingMMGtest\_925\_033day\_calvingstats.txt
- CalvingMMGtest\_925\_033day\_terminusposition.txt
- CalvingMMGtest\_925\_05day\_calvingstats.txt
- CalvingMMGtest\_925\_05day\_terminusposition.txt
- CalvingMMGtest\_925\_2day\_calvingstats.txt
- CalvingMMGtest\_925\_2day\_terminusposition.txt
- CalvingMMGtest\_925\_atime0\_calvingstats.txt
- CalvingMMGtest\_925\_atime0\_terminusposition.txt
- CalvingMMGtest\_925\_atime10\_calvingstats.txt
- CalvingMMGtest\_925\_atime10\_terminusposition.txt
- CalvingMMGtest\_925\_atime1\_calvingstats.txt
- CalvingMMGtest\_925\_atime1\_terminusposition.txt
- CalvingMMGtest\_925\_atime5\_calvingstats.txt
- CalvingMMGtest\_925\_atime5\_terminusposition.txt

- CalvingMMGtest\_925\_control\_calvingstats.txt
- CalvingMMGtest\_925\_control\_terminusposition.txt
- CalvingMMGtest\_925\_h100\_v100\_calvingstats.txt
- CalvingMMGtest\_925\_h100\_v100\_terminusposition.txt
- CalvingMMGtest\_925\_h100\_v50\_calvingstats.txt
- CalvingMMGtest\_925\_h100\_v50\_terminusposition.txt
- CalvingMMGtest\_925\_h25\_v25\_calvingstats.txt
- CalvingMMGtest\_925\_h25\_v25\_restart\_calvingstats.txt
- CalvingMMGtest\_925\_h25\_v25\_restart\_terminusposition.txt
- CalvingMMGtest\_925\_h25\_v25\_terminusposition.txt
- CalvingMMGtest\_925\_h25\_v50\_calvingstats.txt
- CalvingMMGtest\_925\_h25\_v50\_terminusposition.txt
- CalvingMMGtest\_925\_h30\_v30\_calvingstats.txt
- CalvingMMGtest\_925\_h30\_v30\_restart\_calvingstats.txt
- CalvingMMGtest\_925\_h30\_v30\_restart\_terminusposition.txt
- CalvingMMGtest\_925\_h30\_v30\_terminusposition.txt
- CalvingMMGtest\_925\_h30\_v50\_calvingstats.txt
- CalvingMMGtest\_925\_h30\_v50\_terminusposition.txt
- CalvingMMGtest\_925\_h50\_v30\_calvingstats.txt
- CalvingMMGtest\_925\_h50\_v30\_terminusposition.txt
- CalvingMMGtest\_925\_h50\_v70\_calvingstats.txt
- CalvingMMGtest\_925\_h50\_v70\_terminusposition.txt
- CalvingMMGtest\_925\_h70\_v50\_calvingstats.txt
- CalvingMMGtest\_925\_h70\_v50\_terminusposition.txt
- CalvingMMGtest\_925\_h70\_v70\_calvingstats.txt
- CalvingMMGtest\_925\_h70\_v70\_terminusposition.txt
- CalvingMMGtest\_925\_pmesh20\_calvingstats.txt
- CalvingMMGtest\_925\_pmesh20\_terminusposition.txt
- CalvingMMGtest\_925\_pmesh30\_calvingstats.txt
- CalvingMMGtest\_925\_pmesh30\_terminusposition.txt
- CalvingMMGtest\_925\_pmesh60\_calvingstats.txt
- CalvingMMGtest\_925\_pmesh60\_terminusposition.txt
- CalvingMMGtest\_925\_pmesh80\_calvingstats.txt
- CalvingMMGtest\_925\_pmesh80\_terminusposition.txt
- SupplementaryVideo1.mp4
- SupplementaryVideo2.mp4
- SupplementaryVideo3.mp4
- SupplementaryVideo4.mp4
- readme.txt

The copyright of individual parts of the supplement might differ from the article licence.
